# Supplementary material for: Uric acid induces stress resistance and extends the life span through activating the stress response factor DAF-16/FOXO and SKN-1/NRF2
Source: PubMed Central journal article supplement (PMC7041755; doi:10.18632/aging.102781), 2020-02-12
Supplement: aging-12-102781-s002..pdf [file aging-12-102781-s002..pdf]

**Supplementary Table 2. Sequences of PCR primers (qPCR).**

| <b>Primer sequences used for quantitative PCR (5'→3'):</b> |                                     |                                    |
|------------------------------------------------------------|-------------------------------------|------------------------------------|
| <b>Gene</b>                                                | <b>Forward primer sequence</b>      | <b>Reverse primer sequence</b>     |
| <i>cdc-42</i>                                              | CTGCTGGACAGGAAGATTACG               | CTCGGACATTCTCGAATGAAG              |
| <i>sod-3</i>                                               | AGCATCATGCCACCTACGTGA               | AGCATCATGCCACCTACGTGA              |
| <i>skn-1</i>                                               | TGGAGTGTCGTCCATATTCATCT             | TGAGGTGTTGGACGATGGTG               |
| <i>ctl-1</i>                                               | GACGTATCCAAAACCCCAAGTG              | TTGGCATGAACGACACGCTC               |
| <i>ctl-2</i>                                               | TTCCGATCGAGGACTCCCAG                | CTTCACTCCTTGAGTTGGCTTG             |
| <i>ctl-3</i>                                               | CCCACATGGTCAATCTAACGGT              | GGAGCTCCATTGGATGTGGT               |
| <i>rgs-10</i>                                              | TAGTGATTCTGGAGCGTGTTG               | TGGACGGAAGTTCATTAGAGC              |
| <i>hsp-16.1</i>                                            | GTCACCTTACCCTATTTCCGTCAGCTCAACGTTTC | CAACGGGCGCTTGCTGAATTGGAATAGATCTTCC |
| <i>hsp-16.2</i>                                            | CTGCAGAATCTCTCCATCTGAGTC            | AGATTCGAAGCAACTGCACC               |
| <i>hsp-12.6</i>                                            | GTGATGGCTGACGAAGGAAC                | GGGAGGAAGTTATGGGCTTC               |
| <i>hsp-6</i>                                               | GGATGCTGGACAAATCTCTG                | ACAGCGATGATCTTATCTCCA              |
| <i>hsp-60</i>                                              | AAGGATATGGGAATTGCGACGGGA            | TGTGCTCGATTGCTTCTCGATCT            |
| YFP-F                                                      | TATATCATGGCCGACAAGCA                | GTTGTGGCGGATCTTGAAGT               |
